# Supplementary material for: Robotically automated 3D printing and testing of thermoplastic material specimens
Source: Royal Society of Chemistry journal article supplement (doi:10.1039/d3dd00141e), 2023-01-01
Supplement: d3dd00141e1.pdf [file d3dd00141e1.pdf]

# Supporting information for the article: Robotically automated 3D printing and testing of thermoplastic material specimens

Miguel Hernández-del-Valle,<sup>a,b</sup> Christina Schenk,<sup>a</sup> Lucía Echevarría-Pastrana,<sup>a</sup>  
Burcu Ozdemir,<sup>a,c</sup> Enrique Dios-Lázaro,<sup>a,b</sup> Jorge Ilarraza-Zuazo,<sup>a,b</sup> De-Yi  
Wang,<sup>a</sup> and Maciej Haranczyk<sup>\*a</sup>

<sup>a</sup> IMDEA Materials Institute, c/Eric Kandel, 2, 28906 Getafe, Madrid, Spain. Tel: +34 915 49 34 22;  
E-mail: maciej.haranczyk@imdea.org

<sup>b</sup> Universidad Carlos III de Madrid, 28911 Leganés, Madrid, Spain.

<sup>c</sup> Universidad Politécnica de Madrid, 28040 Madrid, Spain.

## Contents:

- **Section 1:** Example of code for running Bayesian Optimization.
- **Section 2:** Example of code for running Latin Hypercube Sampling.
- **Section 3:** Data used to generate the figures of the article.

# Section 1: Example of code for running Bayesian Optimization

This section contains the excerpts of the code used for running the Bayesian Optimization with a single printer. For clarity, only the lines directly related with the Bayesian Optimization have been included, so the code is not executable by itself.

We begin by importing the GPOptimizer from the GPcam library, that can be installed with "pip install gpcam"

```
from gpcam.gp_optimizer import GPOptimizer
```

First we define the parameter bounds

```
s_lb = 50
s_ub = 150
f_lb = 1000
f_ub = 5000
lh_lb = 0.2
lh_ub = 0.6
lw_lb = 0.6
lw_ub = 1.0
```

```
parameter_bounds = np.array([[s_lb, s_ub], [f_lb, f_ub], [lh_lb, lh_ub],
                             [lw_lb, lw_ub]])
```

Secondly, we define the bounds for the hyperparameters

```
hyperparameter_bounds =
np.array([[0.001, 1000], [0.001, 1000], [0.001, 1000], [0.001, 1000], [0.001, 1000]]
)
guess = (0.001+1000.)/2.
hps_guess = np.array([guess, guess, guess, guess, guess])
```

We can now initialize and train a GP with those parameters and hyperparams

```
gp = GPOptimizer(dim, parameter_bounds)

gp.init_gp(hps_guess)
gp.train_gp(hyperparameter_bounds, pop_size = 20, tolerance = 1e-6,
max_iter = 20)
```

We define an acquisition function, in this case UCB with lambda=1

```
def optional_acq_func(x, obj):
    a = 1.0
    m = obj.posterior_mean(x) ["f(x)"]
    v = obj.posterior_covariance(x) ["v(x)"]
    return m + a * np.sqrt(v)
```

We ask GPcam for a first suggestion to start printing

```
nextp = gp.ask(position = None, n = 1, acquisition_function =
```

```

optional_acq_func,
bounds = parameter_bounds,
method = "global", pop_size = 50, max_iter = 20,
tol = 1e-6, dask_client = False)

```

**Generate a gcode using the parameters suggested by GPcam**

```

speed, flow, lh, lw = extract_parameters(nextp)
gcode = set_print_parameters(speed, flow, lh, lw)
start_print_with_gcode(gcode, printer) #sends the gcode to the printer and
starts the printing

```

**We start a loop to do 20 experiments**

```

counter = 0

while counter < 20:

    if printer.printing == False: # The next part is only executed once the
printing has finished

```

**The following line executes all the experimental workflow to measure weight and impact strength**

```

weights, impacts = after_print_workflow_charpy()
mean_weight_diff = np.mean(weights)/expected_weight

```

**We save the parameters as "points" and the results as "values"**

```

points = np.vstack((points, [speed, flow, lh, lw]))
values = np.vstack((values, -abs(1-mean_weight_diff)))

```

**We update the GP by introducing the new points and values**

```

gp.tell(points, values)
gp.train_gp(hyperparameter_bounds, pop_size = 20, tolerance = 1e-6,
max_iter = 20)

```

**We ask for the next point to experiment with**

```

nextp = gp.ask(position = None, n = 1,
acquisition_function = optional_acq_func,
bounds = parameter_bounds, method = "global",
pop_size = 50, max_iter = 20,
tol = 1e-6, dask_client = False)

```

**Generate a gcode using the parameters suggested by GPcam**

```

speed, flow, lh, lw = extract_parameters(nextp)
gcode = set_print_parameters(speed, flow, lh, lw)
start_print_with_gcode(gcode, printer) #sends the gcode to the
printer and starts the printing

```

```

counter = counter+1

```

## Section 2: Example of code for running Latin Hypercube Sampling

Example of the usage of the LatinHypercube function from Scipy to generate 10 LHS points in 4 dimensions:

```
from scipy.stats import qmc
sampler = qmc.LatinHypercube(d=4, centered=True, seed = 42)
sample = sampler.random(n=10)
```

Now, we define the lower and upper bounds of our parameters to rescale the points:

```
s_lb = 50
s_ub = 150
f_lb = 1000
f_ub = 5000
lh_lb = 0.2
lh_ub = 0.6
lw_lb = 0.6
lw_ub = 1.0

l_bounds = [s_lb, f_lb, lh_lb, lw_lb]
u_bounds = [s_ub, f_ub, lh_ub, lw_ub]

lhs_samples = qmc.scale(sample, l_bounds, u_bounds)
```

### Section 3: Data used to generate the figures of the article.

Table 1: Data for Bayesian Optimization of HPLA used in Figures 6, 7, 8, 9 and 10.

| Speed      | Flow       | Layer Height | Layer Width | Weight     | Impact     |
|------------|------------|--------------|-------------|------------|------------|
| 94,5903693 | 1041,65434 | 0,53675802   | 0,69589768  | 0,60393145 | 0,41009389 |
| 108,436089 | 2975,89192 | 0,2431057    | 0,83511068  | 0,87726815 | 0,72662379 |
| 109,763889 | 4993,89602 | 0,49855709   | 0,6035247   | 0,93644153 | 0,84169986 |
| 111,956245 | 2691,81433 | 0,49870066   | 0,73357306  | 0,79601815 | 0,69892512 |
| 82,6626075 | 4999,46923 | 0,50198577   | 0,63066122  | 1,06507056 | 0,84279126 |
| 57,2433828 | 4938,40829 | 0,45838455   | 0,90071234  | 0,93795363 | 0,59681953 |
| 107,401138 | 4243,31906 | 0,27547764   | 0,77933314  | 1,01498656 | 0,77171416 |
| 107,542951 | 4184,68348 | 0,2108603    | 0,99248713  | 1,05887097 | 0,82199876 |
| 149,987655 | 4142,87596 | 0,53442363   | 0,90438772  | 0,8078629  | 0,32381678 |
| 50,0292811 | 3876,45742 | 0,34025611   | 0,68351653  | 0,95811492 | 0,73891521 |
| 149,982262 | 4514,98198 | 0,2642811    | 0,89164408  | 1,0733871  | 0,84229443 |
| 50,0408255 | 4470,01475 | 0,37867271   | 0,92179829  | 0,95861895 | 0,66741776 |
| 50,0061998 | 4369,65177 | 0,392102     | 0,84695193  | 1,07867944 | 0,89553473 |
| 50,0133918 | 4384,84741 | 0,30264408   | 0,98608627  | 1,08165323 | 0,92784289 |
| 50,0088971 | 4208,84476 | 0,217873     | 0,89826837  | 0,93825605 | 0,78912434 |
| 94,0673728 | 4535,03852 | 0,21639402   | 0,64074535  | 1,03190524 | 0,91213151 |
| 96,6597181 | 4552,92591 | 0,22044973   | 0,64277159  | 1,08884409 | 0,86208484 |
| 50,0033571 | 3497,84369 | 0,38406129   | 0,78444204  | 0,9624328  | 0,7528745  |
| 96,7048519 | 4552,07931 | 0,20831767   | 0,8223425   | 0,93331653 | 0,66065502 |
| 50,007354  | 3670,56038 | 0,31107213   | 0,63012847  | 0,96586022 | 0,83161934 |

Table 2: Data for LHS sampling of HPLA used in Figures 6, 7, 8.

| Flow | Speed | Layer Height | Layer Width | Weight     | Impact     |
|------|-------|--------------|-------------|------------|------------|
| 2800 | 105   | 0,22         | 0,86        | 1,08971774 | 0,99790416 |
| 4400 | 115   | 0,58         | 0,66        | 1,11606183 | 1,02996916 |
| 2000 | 55    | 0,54         | 0,7         | 0,98462702 | 0,89569572 |
| 3600 | 125   | 0,38         | 0,9         | 1,11149194 | 1,02184707 |
| 3200 | 85    | 0,5          | 0,98        | 1,08998656 | 0,97664081 |
| 4800 | 75    | 0,3          | 0,82        | 1,12530242 | 1,01381798 |
| 4000 | 95    | 0,34         | 0,94        | 1,12636089 | 1,03008784 |
| 2400 | 145   | 0,42         | 0,78        | 1,07419355 | 0,95857903 |
| 1200 | 65    | 0,46         | 0,62        | 0,81236559 | 0,55235621 |
| 1600 | 135   | 0,26         | 0,74        | 0,97011089 | 0,78930356 |

Table 3: Data for Bayesian Optimization of LPLA used in Figure 11.

| Speed      | Flow       | Layer Height | Layer Width | Weight     | Impact     |
|------------|------------|--------------|-------------|------------|------------|
| 94,5787594 | 1001,85126 | 0,25048521   | 0,93907228  | 0,4563004  | 0,23329012 |
| 123,003642 | 3268,65458 | 0,21959061   | 0,87964956  | 0,97898185 | 0,73050592 |
| 75,1124844 | 3221,13604 | 0,29426776   | 0,69975638  | 0,98109879 | 0,53842761 |
| 146,727426 | 4999,80138 | 0,4639792    | 0,93109783  | 1,14314516 | 0,89651697 |
| 50,0364714 | 3909,63176 | 0,53026139   | 0,83252488  | 1,02560484 | 0,581533   |
| 50,0012254 | 3787,78131 | 0,38458283   | 0,6670455   | 1,12464718 | 0,8885435  |
| 50,0024015 | 3065,48232 | 0,41528671   | 0,87182408  | 1,06895161 | 0,87227732 |
| 50,0056943 | 4288,44831 | 0,33875642   | 0,88064299  | 1,00010081 | 0,76696961 |
| 149,9796   | 2816,26051 | 0,57023334   | 0,73228711  | 1,08402218 | 0,92683076 |
| 149,986199 | 4294,17736 | 0,2843375    | 0,92547587  | 1,16078629 | 0,82140682 |
| 149,999979 | 4201,37046 | 0,37140349   | 0,94955506  | 0,97091734 | 0,72311592 |
| 50,0045205 | 4580,55488 | 0,55873636   | 0,92633094  | 1,17083333 | 0,94551878 |
| 50,0063583 | 4108,98658 | 0,50320312   | 0,68616002  | 0,97726815 | 0,73761287 |
| 149,995383 | 4220,84465 | 0,49876826   | 0,86690372  | 1,1594086  | 1,02012966 |
| 50,016024  | 4114,46494 | 0,46482161   | 0,7395485   | 1,13561828 | 0,96663776 |
| 149,979315 | 3189,38516 | 0,58937482   | 0,90936139  | 0,7609879  | 0,73031794 |
| 149,993287 | 3168,41926 | 0,34822869   | 0,76311552  | 1,17399194 | 1,05165579 |
| 149,99752  | 3328,86887 | 0,41125511   | 0,93782956  | 1,17172379 | 0,99827223 |
| 99,1819121 | 2951,43232 | 0,56961699   | 0,85709064  | 0,9453125  | 0,75283104 |
| 136,403963 | 3221,44574 | 0,51973209   | 0,95578727  | 1,18830645 | 1,00846525 |

Table 4: Data for LHS sampling of LPLA used in Figure 11.

| Speed | Flow | Layer Height | Layer Width | Weight     | Impact     |
|-------|------|--------------|-------------|------------|------------|
| 105   | 2800 | 0,22         | 0,86        | 1,00947581 | 0,91910473 |
| 115   | 4400 | 0,58         | 0,66        | 1,03261089 | 0,93440285 |
| 55    | 2000 | 0,54         | 0,7         | 1,07896505 | 0,95562446 |
| 85    | 3200 | 0,5          | 0,98        | 0,99146505 | 0,90318142 |
| 125   | 3600 | 0,38         | 0,9         | 1,11507056 | 1,02987616 |
| 75    | 4800 | 0,3          | 0,82        | 1,09309476 | 0,93440285 |
| 95    | 4000 | 0,34         | 0,94        | 1,13172043 | 0,96593215 |
| 145   | 2400 | 0,42         | 0,78        | 0,90141129 | 0,78156169 |
| 65    | 1200 | 0,46         | 0,62        | 0,88004032 | 0,49175611 |
| 135   | 1600 | 0,26         | 0,74        | 0,78608871 | 0,61723864 |

Table 5: Data of LHS repeated in the two printers for two runs each to test repeatability (Figure 12)

| Printer run | Speed    | Flow     | LH       | LW       | Weight |
|-------------|----------|----------|----------|----------|--------|
| 1           | 1.05e+02 | 2.80e+03 | 2.20e-01 | 8.60e-01 | 3.97   |
| 1           | 1.05e+02 | 2.80e+03 | 2.20e-01 | 8.60e-01 | 4.04   |
| 1           | 1.05e+02 | 2.80e+03 | 2.20e-01 | 8.60e-01 | 3.81   |
| 1           | 1.05e+02 | 2.80e+03 | 2.20e-01 | 8.60e-01 | 3.98   |
| 2           | 1.05e+02 | 2.80e+03 | 2.20e-01 | 8.60e-01 | 4.29   |
| 2           | 1.05e+02 | 2.80e+03 | 2.20e-01 | 8.60e-01 | 4.29   |
| 2           | 1.05e+02 | 2.80e+03 | 2.20e-01 | 8.60e-01 | 4.31   |
| 2           | 1.05e+02 | 2.80e+03 | 2.20e-01 | 8.60e-01 | 4.32   |
| 1           | 1.15e+02 | 4.40e+03 | 5.80e-01 | 6.60e-01 | 4.14   |
| 1           | 1.15e+02 | 4.40e+03 | 5.80e-01 | 6.60e-01 | 4.22   |
| 1           | 1.15e+02 | 4.40e+03 | 5.80e-01 | 6.60e-01 | 4.15   |
| 1           | 1.15e+02 | 4.40e+03 | 5.80e-01 | 6.60e-01 | 4.19   |
| 2           | 1.15e+02 | 4.40e+03 | 5.80e-01 | 6.60e-01 | 4.50   |
| 2           | 1.15e+02 | 4.40e+03 | 5.80e-01 | 6.60e-01 | 4.47   |
| 2           | 1.15e+02 | 4.40e+03 | 5.80e-01 | 6.60e-01 | 4.48   |
| 2           | 1.15e+02 | 4.40e+03 | 5.80e-01 | 6.60e-01 | 4.44   |
| 1           | 5.50e+01 | 2.00e+03 | 5.40e-01 | 7.00e-01 | 3.52   |
| 1           | 5.50e+01 | 2.00e+03 | 5.40e-01 | 7.00e-01 | 3.57   |
| 1           | 5.50e+01 | 2.00e+03 | 5.40e-01 | 7.00e-01 | 3.53   |
| 1           | 5.50e+01 | 2.00e+03 | 5.40e-01 | 7.00e-01 | 3.64   |
| 2           | 5.50e+01 | 2.00e+03 | 5.40e-01 | 7.00e-01 | 4.13   |
| 2           | 5.50e+01 | 2.00e+03 | 5.40e-01 | 7.00e-01 | 4.08   |
| 2           | 5.50e+01 | 2.00e+03 | 5.40e-01 | 7.00e-01 | 4.07   |
| 2           | 5.50e+01 | 2.00e+03 | 5.40e-01 | 7.00e-01 | 4.12   |
| 1           | 1.25e+02 | 3.60e+03 | 3.80e-01 | 9.00e-01 | 4.23   |
| 1           | 1.25e+02 | 3.60e+03 | 3.80e-01 | 9.00e-01 | 4.22   |
| 1           | 1.25e+02 | 3.60e+03 | 3.80e-01 | 9.00e-01 | 4.21   |
| 1           | 1.25e+02 | 3.60e+03 | 3.80e-01 | 9.00e-01 | 4.26   |
| 2           | 1.25e+02 | 3.60e+03 | 3.80e-01 | 9.00e-01 | 4.39   |
| 2           | 1.25e+02 | 3.60e+03 | 3.80e-01 | 9.00e-01 | 4.44   |
| 2           | 1.25e+02 | 3.60e+03 | 3.80e-01 | 9.00e-01 | 4.44   |
| 2           | 1.25e+02 | 3.60e+03 | 3.80e-01 | 9.00e-01 | 4.42   |
| 1           | 8.50e+01 | 3.20e+03 | 5.00e-01 | 9.80e-01 | 4.19   |
| 1           | 8.50e+01 | 3.20e+03 | 5.00e-01 | 9.80e-01 | 4.21   |
| 1           | 8.50e+01 | 3.20e+03 | 5.00e-01 | 9.80e-01 | 4.16   |
| 1           | 8.50e+01 | 3.20e+03 | 5.00e-01 | 9.80e-01 | 4.20   |
| 2           | 8.50e+01 | 3.20e+03 | 5.00e-01 | 9.80e-01 | 4.40   |
| 2           | 8.50e+01 | 3.20e+03 | 5.00e-01 | 9.80e-01 | 4.36   |

|   |          |          |          |          |      |
|---|----------|----------|----------|----------|------|
| 2 | 8.50e+01 | 3.20e+03 | 5.00e-01 | 9.80e-01 | 4.38 |
| 2 | 8.50e+01 | 3.20e+03 | 5.00e-01 | 9.80e-01 | 4.38 |
| 1 | 7.50e+01 | 4.80e+03 | 3.00e-01 | 8.20e-01 | 4.34 |
| 1 | 7.50e+01 | 4.80e+03 | 3.00e-01 | 8.20e-01 | 4.36 |
| 1 | 7.50e+01 | 4.80e+03 | 3.00e-01 | 8.20e-01 | 4.32 |
| 1 | 7.50e+01 | 4.80e+03 | 3.00e-01 | 8.20e-01 | 4.36 |
| 2 | 7.50e+01 | 4.80e+03 | 3.00e-01 | 8.20e-01 | 4.39 |
| 2 | 7.50e+01 | 4.80e+03 | 3.00e-01 | 8.20e-01 | 4.37 |
| 2 | 7.50e+01 | 4.80e+03 | 3.00e-01 | 8.20e-01 | 4.39 |
| 2 | 7.50e+01 | 4.80e+03 | 3.00e-01 | 8.20e-01 | 4.41 |
| 1 | 9.50e+01 | 4.00e+03 | 3.40e-01 | 9.40e-01 | 4.20 |
| 1 | 9.50e+01 | 4.00e+03 | 3.40e-01 | 9.40e-01 | 4.20 |
| 1 | 9.50e+01 | 4.00e+03 | 3.40e-01 | 9.40e-01 | 4.21 |
| 1 | 9.50e+01 | 4.00e+03 | 3.40e-01 | 9.40e-01 | 4.19 |
| 2 | 9.50e+01 | 4.00e+03 | 3.40e-01 | 9.40e-01 | 4.44 |
| 2 | 9.50e+01 | 4.00e+03 | 3.40e-01 | 9.40e-01 | 4.43 |
| 2 | 9.50e+01 | 4.00e+03 | 3.40e-01 | 9.40e-01 | 4.46 |
| 2 | 9.50e+01 | 4.00e+03 | 3.40e-01 | 9.40e-01 | 4.44 |
| 1 | 1.45e+02 | 2.40e+03 | 4.20e-01 | 7.80e-01 | 4.02 |
| 1 | 1.45e+02 | 2.40e+03 | 4.20e-01 | 7.80e-01 | 3.88 |
| 1 | 1.45e+02 | 2.40e+03 | 4.20e-01 | 7.80e-01 | 3.85 |
| 1 | 1.45e+02 | 2.40e+03 | 4.20e-01 | 7.80e-01 | 3.91 |
| 2 | 1.45e+02 | 2.40e+03 | 4.20e-01 | 7.80e-01 | 4.37 |
| 2 | 1.45e+02 | 2.40e+03 | 4.20e-01 | 7.80e-01 | 4.35 |
| 2 | 1.45e+02 | 2.40e+03 | 4.20e-01 | 7.80e-01 | 4.33 |
| 2 | 1.45e+02 | 2.40e+03 | 4.20e-01 | 7.80e-01 | 4.32 |
| 1 | 6.50e+01 | 1.20e+03 | 4.60e-01 | 6.20e-01 | 2.53 |
| 1 | 6.50e+01 | 1.20e+03 | 4.60e-01 | 6.20e-01 | 2.74 |
| 1 | 6.50e+01 | 1.20e+03 | 4.60e-01 | 6.20e-01 | 2.76 |
| 1 | 6.50e+01 | 1.20e+03 | 4.60e-01 | 6.20e-01 | 2.73 |
| 2 | 6.50e+01 | 1.20e+03 | 4.60e-01 | 6.20e-01 | 3.53 |
| 2 | 6.50e+01 | 1.20e+03 | 4.60e-01 | 6.20e-01 | 3.55 |
| 2 | 6.50e+01 | 1.20e+03 | 4.60e-01 | 6.20e-01 | 3.49 |
| 2 | 6.50e+01 | 1.20e+03 | 4.60e-01 | 6.20e-01 | 3.56 |
| 1 | 1.35e+02 | 1.60e+03 | 2.60e-01 | 7.40e-01 | 3.39 |
| 1 | 1.35e+02 | 1.60e+03 | 2.60e-01 | 7.40e-01 | 3.31 |
| 1 | 1.35e+02 | 1.60e+03 | 2.60e-01 | 7.40e-01 | 3.38 |
| 1 | 1.35e+02 | 1.60e+03 | 2.60e-01 | 7.40e-01 | 3.44 |
| 2 | 1.35e+02 | 1.60e+03 | 2.60e-01 | 7.40e-01 | 3.93 |
| 2 | 1.35e+02 | 1.60e+03 | 2.60e-01 | 7.40e-01 | 3.93 |
| 2 | 1.35e+02 | 1.60e+03 | 2.60e-01 | 7.40e-01 | 3.91 |
| 2 | 1.35e+02 | 1.60e+03 | 2.60e-01 | 7.40e-01 | 4.00 |



|   |          |          |          |          |      |
|---|----------|----------|----------|----------|------|
| 3 | 1.05e+02 | 2.80e+03 | 2.20e-01 | 8.60e-01 | 4.13 |
| 3 | 1.05e+02 | 2.80e+03 | 2.20e-01 | 8.60e-01 | 4.09 |
| 3 | 1.05e+02 | 2.80e+03 | 2.20e-01 | 8.60e-01 | 4.12 |
| 3 | 1.05e+02 | 2.80e+03 | 2.20e-01 | 8.60e-01 | 4.19 |
| 4 | 1.05e+02 | 2.80e+03 | 2.20e-01 | 8.60e-01 | 4.33 |
| 4 | 1.05e+02 | 2.80e+03 | 2.20e-01 | 8.60e-01 | 4.35 |
| 4 | 1.05e+02 | 2.80e+03 | 2.20e-01 | 8.60e-01 | 4.32 |
| 4 | 1.05e+02 | 2.80e+03 | 2.20e-01 | 8.60e-01 | 4.36 |
| 3 | 1.15e+02 | 4.40e+03 | 5.80e-01 | 6.60e-01 | 4.29 |
| 3 | 1.15e+02 | 4.40e+03 | 5.80e-01 | 6.60e-01 | 4.28 |
| 3 | 1.15e+02 | 4.40e+03 | 5.80e-01 | 6.60e-01 | 4.23 |
| 3 | 1.15e+02 | 4.40e+03 | 5.80e-01 | 6.60e-01 | 4.21 |
| 4 | 1.15e+02 | 4.40e+03 | 5.80e-01 | 6.60e-01 | 4.49 |
| 4 | 1.15e+02 | 4.40e+03 | 5.80e-01 | 6.60e-01 | 4.48 |
| 4 | 1.15e+02 | 4.40e+03 | 5.80e-01 | 6.60e-01 | 4.49 |
| 4 | 1.15e+02 | 4.40e+03 | 5.80e-01 | 6.60e-01 | 4.45 |
| 3 | 5.50e+01 | 2.00e+03 | 5.40e-01 | 7.00e-01 | 3.83 |
| 3 | 5.50e+01 | 2.00e+03 | 5.40e-01 | 7.00e-01 | 3.77 |
| 3 | 5.50e+01 | 2.00e+03 | 5.40e-01 | 7.00e-01 | 3.75 |
| 3 | 5.50e+01 | 2.00e+03 | 5.40e-01 | 7.00e-01 | 3.76 |
| 4 | 5.50e+01 | 2.00e+03 | 5.40e-01 | 7.00e-01 | 4.12 |
| 4 | 5.50e+01 | 2.00e+03 | 5.40e-01 | 7.00e-01 | 4.10 |
| 4 | 5.50e+01 | 2.00e+03 | 5.40e-01 | 7.00e-01 | 4.12 |
| 4 | 5.50e+01 | 2.00e+03 | 5.40e-01 | 7.00e-01 | 4.09 |
| 3 | 1.25e+02 | 3.60e+03 | 3.80e-01 | 9.00e-01 | 4.19 |
| 3 | 1.25e+02 | 3.60e+03 | 3.80e-01 | 9.00e-01 | 4.14 |
| 3 | 1.25e+02 | 3.60e+03 | 3.80e-01 | 9.00e-01 | 4.12 |
| 3 | 1.25e+02 | 3.60e+03 | 3.80e-01 | 9.00e-01 | 4.18 |
| 4 | 1.25e+02 | 3.60e+03 | 3.80e-01 | 9.00e-01 | 4.43 |
| 4 | 1.25e+02 | 3.60e+03 | 3.80e-01 | 9.00e-01 | 4.44 |
| 4 | 1.25e+02 | 3.60e+03 | 3.80e-01 | 9.00e-01 | 4.38 |
| 4 | 1.25e+02 | 3.60e+03 | 3.80e-01 | 9.00e-01 | 4.44 |
| 3 | 8.50e+01 | 3.20e+03 | 5.00e-01 | 9.80e-01 | 4.04 |
| 3 | 8.50e+01 | 3.20e+03 | 5.00e-01 | 9.80e-01 | 4.09 |
| 3 | 8.50e+01 | 3.20e+03 | 5.00e-01 | 9.80e-01 | 4.17 |
| 3 | 8.50e+01 | 3.20e+03 | 5.00e-01 | 9.80e-01 | 4.14 |
| 4 | 8.50e+01 | 3.20e+03 | 5.00e-01 | 9.80e-01 | 4.38 |
| 4 | 8.50e+01 | 3.20e+03 | 5.00e-01 | 9.80e-01 | 4.37 |
| 4 | 8.50e+01 | 3.20e+03 | 5.00e-01 | 9.80e-01 | 4.38 |
| 4 | 8.50e+01 | 3.20e+03 | 5.00e-01 | 9.80e-01 | 4.35 |
| 3 | 7.50e+01 | 4.80e+03 | 3.00e-01 | 8.20e-01 | 4.36 |
| 3 | 7.50e+01 | 4.80e+03 | 3.00e-01 | 8.20e-01 | 4.34 |

|   |          |          |          |          |      |
|---|----------|----------|----------|----------|------|
| 3 | 7.50e+01 | 4.80e+03 | 3.00e-01 | 8.20e-01 | 4.40 |
| 3 | 7.50e+01 | 4.80e+03 | 3.00e-01 | 8.20e-01 | 4.36 |
| 4 | 7.50e+01 | 4.80e+03 | 3.00e-01 | 8.20e-01 | 4.42 |
| 4 | 7.50e+01 | 4.80e+03 | 3.00e-01 | 8.20e-01 | 4.33 |
| 4 | 7.50e+01 | 4.80e+03 | 3.00e-01 | 8.20e-01 | 4.36 |
| 4 | 7.50e+01 | 4.80e+03 | 3.00e-01 | 8.20e-01 | 4.48 |
| 3 | 9.50e+01 | 4.00e+03 | 3.40e-01 | 9.40e-01 | 4.13 |
| 3 | 9.50e+01 | 4.00e+03 | 3.40e-01 | 9.40e-01 | 4.20 |
| 3 | 9.50e+01 | 4.00e+03 | 3.40e-01 | 9.40e-01 | 4.30 |
| 3 | 9.50e+01 | 4.00e+03 | 3.40e-01 | 9.40e-01 | 4.27 |
| 4 | 9.50e+01 | 4.00e+03 | 3.40e-01 | 9.40e-01 | 4.45 |
| 4 | 9.50e+01 | 4.00e+03 | 3.40e-01 | 9.40e-01 | 4.48 |
| 4 | 9.50e+01 | 4.00e+03 | 3.40e-01 | 9.40e-01 | 4.50 |
| 4 | 9.50e+01 | 4.00e+03 | 3.40e-01 | 9.40e-01 | 4.46 |
| 3 | 1.45e+02 | 2.40e+03 | 4.20e-01 | 7.80e-01 | 3.80 |
| 3 | 1.45e+02 | 2.40e+03 | 4.20e-01 | 7.80e-01 | 3.95 |
| 3 | 1.45e+02 | 2.40e+03 | 4.20e-01 | 7.80e-01 | 3.93 |
| 3 | 1.45e+02 | 2.40e+03 | 4.20e-01 | 7.80e-01 | 3.88 |
| 4 | 1.45e+02 | 2.40e+03 | 4.20e-01 | 7.80e-01 | 4.32 |
| 4 | 1.45e+02 | 2.40e+03 | 4.20e-01 | 7.80e-01 | 4.34 |
| 4 | 1.45e+02 | 2.40e+03 | 4.20e-01 | 7.80e-01 | 4.34 |
| 4 | 1.45e+02 | 2.40e+03 | 4.20e-01 | 7.80e-01 | 4.31 |
| 3 | 6.50e+01 | 1.20e+03 | 4.60e-01 | 6.20e-01 | 2.74 |
| 3 | 6.50e+01 | 1.20e+03 | 4.60e-01 | 6.20e-01 | 2.77 |
| 3 | 6.50e+01 | 1.20e+03 | 4.60e-01 | 6.20e-01 | 2.84 |
| 3 | 6.50e+01 | 1.20e+03 | 4.60e-01 | 6.20e-01 | 2.59 |
| 4 | 6.50e+01 | 1.20e+03 | 4.60e-01 | 6.20e-01 | 3.63 |
| 4 | 6.50e+01 | 1.20e+03 | 4.60e-01 | 6.20e-01 | 3.54 |
| 4 | 6.50e+01 | 1.20e+03 | 4.60e-01 | 6.20e-01 | 3.67 |
| 4 | 6.50e+01 | 1.20e+03 | 4.60e-01 | 6.20e-01 | 3.60 |
| 3 | 1.35e+02 | 1.60e+03 | 2.60e-01 | 7.40e-01 | 3.42 |
| 3 | 1.35e+02 | 1.60e+03 | 2.60e-01 | 7.40e-01 | 3.26 |
| 3 | 1.35e+02 | 1.60e+03 | 2.60e-01 | 7.40e-01 | 3.32 |
| 3 | 1.35e+02 | 1.60e+03 | 2.60e-01 | 7.40e-01 | 3.44 |
| 4 | 1.35e+02 | 1.60e+03 | 2.60e-01 | 7.40e-01 | 3.96 |
| 4 | 1.35e+02 | 1.60e+03 | 2.60e-01 | 7.40e-01 | 3.99 |
| 4 | 1.35e+02 | 1.60e+03 | 2.60e-01 | 7.40e-01 | 3.92 |
| 4 | 1.35e+02 | 1.60e+03 | 2.60e-01 | 7.40e-01 | 3.95 |

Table 6: Data for Bayesian Optimization of HPLA in a single printer (Figure 13)

| Flow       | Speed      | Layer Height | Layer Width | Weight     | Impact     |
|------------|------------|--------------|-------------|------------|------------|
| 4991,62016 | 137,445129 | 0,40883653   | 0,671793    | 1,10241935 | 0,93440285 |
| 1000,5315  | 52,1313499 | 0,2707154    | 0,67169354  | 0,6188004  | 0,36397312 |
| 4821,84146 | 75,467274  | 0,36410931   | 0,93649548  | 1,09764785 | 0,94551878 |
| 4129,60814 | 149,991028 | 0,45356054   | 0,80265424  | 1,06441532 | 0,88772937 |
| 3530,29496 | 50,0095311 | 0,53981602   | 0,7882906   | 1,05685484 | 0,86495958 |
| 3095,3563  | 149,99716  | 0,57170345   | 0,82408563  | 1,04482527 | 0,94532309 |
| 2824,3401  | 50,0348354 | 0,28113368   | 0,83709138  | 1,00665323 | 0,93447982 |
| 2615,91355 | 149,986158 | 0,20868301   | 0,99019419  | 0,9749496  | 0,84950986 |
| 2779,95271 | 50,0069854 | 0,33205365   | 0,85637678  | 1,05120968 | 0,91153496 |
| 2851,38039 | 149,982472 | 0,35882803   | 0,64186208  | 1,02268145 | 0,79157875 |
| 2798,00399 | 149,990007 | 0,28927794   | 0,97257634  | 1,03462702 | 0,94243673 |
| 2958,87771 | 50,0325984 | 0,28849753   | 0,7217728   | 1,03361895 | 0,74808247 |
| 2552,77932 | 50,0076875 | 0,31171302   | 0,79319913  | 0,98981855 | 0,87251997 |
| 2436,15713 | 50,0286186 | 0,45313225   | 0,9731165   | 0,96606183 | 0,79164522 |
| 2622,49107 | 50,0003147 | 0,35863958   | 0,72309482  | 1,00806452 | 0,91879214 |
| 2619,60609 | 50,0086551 | 0,49248131   | 0,77885676  | 1,02701613 | 0,88805136 |
| 2557,55358 | 149,987843 | 0,29969475   | 0,62628683  | 0,99388441 | 0,79152722 |
| 2544,87418 | 149,996106 | 0,22789782   | 0,89792753  | 1,02363911 | 0,8283349  |
| 2607,08274 | 50,0081727 | 0,23788634   | 0,60355119  | 1,00302419 | 0,66754689 |
| 2607,14055 | 50,0003415 | 0,30560658   | 0,92893133  | 0,99791667 | 0,89298583 |
